# Supplementary material
Source: PubMed Central journal article supplement (PMC4116413)
Supplement: supp_00320.2012_supptables.pdf [file supp_00320.2012_supptables.pdf]

**Table 1. Genes in Cluster 1**

| <b>Gene Name</b>                                                                                               |
|----------------------------------------------------------------------------------------------------------------|
| 0 day neonate skin cDNA, RIKEN clone:4631422I05 product:unclassifiable, full insert sequence                   |
| adaptor protein with pleckstrin homology and src (Aps)                                                         |
| adrenomedullin (Adm)                                                                                           |
| adult male lung cDNA, RIKEN clone:1200014K04 product:similar to GRAB [Rattus norvegicus], full insert sequence |
| adult male stomach cDNA, RIKEN clone:2210415K03 product:unknown EST, full insert sequence                      |
| AGENCOURT_10495819 NIH_MGC_144 cDNA clone IMAGE:6535574 5'                                                     |
| amphiregulin (Areg)                                                                                            |
| ATPase, Na <sup>+</sup> /K <sup>+</sup> transporting, alpha 3 polypeptide (Atp1a3)                             |
| AXL receptor tyrosine kinase (Axl)                                                                             |
| Bcl2-associated X protein (Bax)                                                                                |
| calcium/calmodulin-dependent protein kinase I (Camk1)                                                          |
| cathepsin B (Ctsb)                                                                                             |
| cathepsin D (Ctsd)                                                                                             |
| cathepsin K (Ctsk)                                                                                             |
| CD33 antigen (Cd33)                                                                                            |
| CD68 antigen (Cd68)                                                                                            |
| cDNA sequence BC022145 (BC022145)                                                                              |
| cell adhesion molecule with homology to L1CAM (Chl1)                                                           |
| chemokine (C-C motif) receptor 1 (Ccr1)                                                                        |
| chemokine orphan receptor 1 (Cmkor1)                                                                           |
| coactosin-like 1 (Dictyostelium) (Cotl1)                                                                       |
| colony stimulating factor 1 receptor (Csf1r)                                                                   |
| complement component 3a receptor 1 (C3ar1)                                                                     |
| coronin, actin binding protein 1C (Coro1c)                                                                     |
| creatine kinase, brain (Ckb)                                                                                   |
| C-type (calcium dependent, carbohydrate recognition domain) lectin, superfamily member 10 (Clecsf10)           |
| C-type (calcium dependent, carbohydrate recognition domain) lectin, superfamily member 6 (Clecsf6)             |
| cyclin-dependent kinase inhibitor 1A (P21) (Cdkn1a)                                                            |
| cytochrome b-561 (Cyb561)                                                                                      |
| dihydropyrimidinase-like 3 (Dpysl3)                                                                            |
| DNA segment, Chr 1, Brigham & Women's Genetics 1363 expressed (D1Bwg1363e), transcript variant 2               |
| Down syndrome critical region homolog 1 (human) (Dscr1)                                                        |
| Emr1 mRNA, alternatively spliced fragment A                                                                    |
| endothelial differentiation, sphingolipid G-protein-coupled receptor, 5 (Edg5)                                 |
| Fc receptor, IgE, high affinity I, gamma polypeptide (Fcer1g)                                                  |
| Fc receptor, IgG, low affinity III (Fcgr3)                                                                     |
| feline sarcoma oncogene (Fes)                                                                                  |
| fibromodulin (Fmod)                                                                                            |
| follistatin (Fst)                                                                                              |
| fucosyltransferase 7 (Fut7)                                                                                    |
| GA repeat binding protein, beta 2 (Gabpb2)                                                                     |

---

galactosylceramidase (Galc), mRNA  
gap junction membrane channel protein beta 3 (Gjb3)  
gap junction membrane channel protein beta 5 (Gjb5)  
glucuronidase, beta (Gusb)  
glycoprotein 49 A (Gp49a)  
growth differentiation factor 15 (Gdf15)  
heterogeneous nuclear ribonucleoproteins methyltransferase-like 2 (S cerevisiae) (Hrmt112)  
hexosaminidase A (Hexa)  
hydroxysteroid 11-beta dehydrogenase 2 (Hsd11b2)  
Ig rearranged gamma-chain mRNA V-region  
interferon gamma inducible protein 30 (Ifi30)  
lamin A (Lmna), transcript variant 1  
legumain (Lgmn)  
lipoma HMGIC fusion partner-like 2 (Lhfpl2)  
lymphoblastic leukemia (Lyl1)  
lysyl oxidase-like 2 (Lox12)  
macrophage scavenger receptor 2 (Msr2)  
matrix metalloproteinase 12 (Mmp12)  
matrix metalloproteinase 8 (Mmp8)  
membrane-spanning 4-domains, subfamily A, member 11 (Ms4a11)  
membrane-spanning 4-domains, subfamily A, member 6D (Ms4a6d)  
milk fat globule-EGF factor 8 protein (Mfge8)  
mitogen activated protein kinase 13 (Mapk13)  
moesin (Msn)  
myeloid-associated differentiation marker (Myadm)  
neutrophil cytosolic factor 1 (Ncf1)  
paired related homeobox 2 (Prrx2)  
plasminogen activator, tissue (Plat)  
polymerase (RNA) III (DNA directed) polypeptide D (Polr3d)  
potassium voltage-gated channel, Isk-related subfamily, gene 4 (Kcne4)  
procollagen, type I, alpha 1 (Col1a1)  
procollagen, type I, alpha 2 (Col1a2)  
procollagen, type V, alpha 1 (Col5a1)  
procollagen, type V, alpha 3 (Col5a3)  
procollagen, type XII, alpha 1 (Col12a1)  
prosaposin (Psap)  
protein tyrosine phosphatase, non-receptor type substrate 1 (Ptpns1)  
protein-glutamine gamma-glutamyltransferase (Tgm2) mRNA  
proteoglycan, PG-M  
putative transmembrane glycoprotein (NMB gene)  
pyruvate kinase, muscle (Pkm2)  
RAB3A interacting protein (rabin3)-like 1 (Rab3il1)  
RIKEN cDNA 1700112C13 gene (1700112C13Rik)  
RIKEN cDNA 1810019A08 gene (1810019A08Rik)  
RIKEN cDNA 2010004A03 gene (2010004A03Rik)  
RIKEN cDNA 2310057H16 gene (2310057H16Rik)  
RIKEN cDNA 2810043G13 gene, mRNA (cDNA clone IMAGE:6330338)  
RIKEN cDNA 4921501M20 gene (4921501M20Rik)  
RIKEN cDNA 9030409G11 gene, mRNA (cDNA clone MGC:30602)

---

---

IMAGE:3667377)

RIKEN CRL-1722 L5178Y-R cDNA clone I730067C22 3'

secreted frizzled-related sequence protein 1 (Sfrp1)

serine (or cysteine) proteinase inhibitor, clade B, member 9 (Serpib9)

SERTA domain containing 1 (Sertad1)

SH3 and cysteine rich domain 2 (Stac2)

small proline-rich protein 1A (Sprr1a)

sodium channel, voltage-gated, type I, beta polypeptide (Scn1b)

solute carrier family 15, member 3 (Slc15a3)

solute carrier family 7 (cationic amino acid transporter, y<sup>+</sup> system), member 1 (Slc7a1)

sphingosine kinase 1 (Sphk1)

src family associated phosphoprotein 2 (Scap2)

suppressor of cytokine signaling 3 (Socs3)

synaptogyrin 1 (Syngr1), transcript variant 1b

tenascin C (Tnc)

testican-2 protein

TGF-beta-inducible protein (TSC-36) mRNA

thrombospondin 4 (Thbs4)

thrombospondin type 1 domain containing gene (Rspodin)

thrombospondin, type I domain containing 6 (Thsd6)

thromboxane A synthase 1, platelet (Tbxas1)

tissue inhibitor of metalloproteinase 1 (Timp1)

tissue-type vomeronasal neurons putative pheromone receptor V2R2 (V2R2)

transforming growth factor, beta induced (Tgfbi)

transforming growth factor, beta receptor II (Tgfbr2), transcript variant 2

triggering receptor expressed on myeloid cells 2 (Trem2)

tripartite motif-containing 35 (Trim35)

tumor necrosis factor receptor superfamily, member 12a (Tnfrsf12a)

tumor necrosis factor receptor superfamily, member 23 (Tnfrsf23)

tumor-associated calcium signal transducer 2 (Tacstd2)

tumor-associated membrane protein (TMP) mRNA

UDP-GlcNAc:betaGal beta-1,3-N-acetylglucosaminyltransferase 7 (B3gnt7)

unc-93 homolog B1 (C elegans) (Unc93b1)

von Hippel-Lindau syndrome homolog (Vhlh)

v-ral simian leukemia viral oncogene homolog B (ras related) (Ralb)

X-prolyl aminopeptidase (aminopeptidase P) 1, soluble (Xpnpep1)

---

**Table 2. Genes in Cluster 2**

| <b>Gene name</b>                                                                                                                                                |
|-----------------------------------------------------------------------------------------------------------------------------------------------------------------|
| 13 days embryo head cDNA, RIKEN clone:3110030K17 product:hypothetical protein, full insert sequence                                                             |
| 16 days embryo head cDNA, RIKEN clone:C130072E11 product:hypothetical Calponin-homology domain, CH-domain structure containing protein, full insert sequence    |
| 16 days embryo lung cDNA, RIKEN clone:8430436A10 product:weakly similar to RAT CYTOCHROME P-450B TYPE E (FRAGMENT) [Rattus norvegicus], full insert sequence    |
| adult male cerebellum cDNA, RIKEN clone:1500002C15 product:unknown EST, full insert sequence                                                                    |
| adult male testis cDNA, RIKEN clone:4930505O20 product:hypothetical protein, full insert sequence                                                               |
| adult male testis cDNA, RIKEN clone:4931429D10 product:similar to URAX1 PROTEIN [Homo sapiens], full insert sequence                                            |
| adult male testis cDNA, RIKEN clone:4933401F05 product:hypothetical Serine proteases, trypsin family containing protein, full insert sequence                   |
| adult male thymus cDNA, RIKEN clone:5830420C07 product:unknown EST, full insert sequence                                                                        |
| AGENCOURT_24953879 NIH_MGC_169 cDNA clone IMAGE:30920354 5' C80811 Mouse 35-dpc blastocyst cDNA cDNA clone J0088G01 3' similar to Human mRNA for KIAA0097 gene. |
| calcium response factor (Carf)                                                                                                                                  |
| carboxypeptidase Z (Cpz)                                                                                                                                        |
| cDNA sequence BC003324 (BC003324)                                                                                                                               |
| cDNA sequence BC019776 (BC019776)                                                                                                                               |
| cDNA sequence BC030417 (BC030417)                                                                                                                               |
| Description                                                                                                                                                     |
| dihydrolipoamide S-succinyltransferase (E2 component of 2-oxo-glutarate complex) (Dlst)                                                                         |
| DNA segment, Chr 15, Wayne State University 75, expressed (D15Wsu75e)                                                                                           |
| DNA segment, Chr 2, Wayne State University 81, expressed (D2Wsu81e)                                                                                             |
| endoplasmic reticulum protein 29 (Erp29)                                                                                                                        |
| EPS8-like 1 (Eps811)                                                                                                                                            |
| galactosamine (N-acetyl)-6-sulfate sulfatase (Galns)                                                                                                            |
| glycosyltransferase-like 1B (Gylt1b)                                                                                                                            |
| Huntington disease gene homolog (Hdh)                                                                                                                           |
| immunoglobulin superfamily, member 7 (Igsf7)                                                                                                                    |
| integrin beta 3 (Itgb3)                                                                                                                                         |
| Janus kinase 3 (Jak3)                                                                                                                                           |
| low-density lipoprotein receptor-related protein 10 (Lrp10)                                                                                                     |
| lysophospholipase 3 (Lypla3)                                                                                                                                    |
| mammary tumor virus receptor 2 (Mtvr2)                                                                                                                          |
| melanocortin 1 receptor (Mclr)                                                                                                                                  |
| membrane-associated protein 17 (Map17)                                                                                                                          |
| mKIAA1247 protein                                                                                                                                               |
| Mmusculus mRNA for neurocan                                                                                                                                     |
| myeloid ecotropic viral integration site-related gene 2 (Mrg2)                                                                                                  |

neuregulin 3 (Nrg3)  
 NFkB inhibitor interacting Ras-like protein 2 (Nkiras2)  
 nitric oxide synthase 2, inducible, macrophage (Nos2)  
 olfactory receptor 1126 (Olf1126)  
 olfactory receptor 127 (Olf127), mRNA  
 olfactory receptor 1360 (Olf1360)  
 olfactory receptor 502 (Olf502), mRNA  
 OTU domain, ubiquitin aldehyde binding 1 (Otub1)  
 oxidized low density lipoprotein (lectin-like) receptor 1 (Olr1)  
 paxillin (Pxn), transcript variant alpha  
 phosphatidylinositol-4-phosphate 5-kinase, type II, gamma (Pip5k2c)  
 phospholipase D3 (Pld3)  
 predicted gene ICRFP703B1614Q55 (ICRFP703B1614Q5.5)  
 processing of precursor 7, ribonuclease P family, (*S cerevisiae*) (Pop7)  
 procollagen-lysine, 2-oxoglutarate 5-dioxygenase 3 (Plod3)  
 Rap2 interacting protein (Rap2ip)  
 Ras-related associated with diabetes (Rad)  
 Rho GDP dissociation inhibitor (GDI) alpha (Arhgdia)  
 rhomboid, veinlet-like 6 (*Drosophila*) (Rhbdl6)  
 RIKEN 0 day neonate head cDNA clone 4833434E01 3'  
 RIKEN 13 days embryo forelimb cDNA clone 5930414A15 3'  
 RIKEN 16 days neonate cerebellum cDNA clone 9630015L23 3'  
 RIKEN adult male liver tumor cDNA clone C730027P07 3'  
 RIKEN B16 F10Y cells cDNA clone G370076M11 3'  
 RIKEN cDNA 2310022B05 gene (2310022B05Rik)  
 RIKEN cDNA 4933440M02 gene (4933440M02Rik)  
 RIKEN cDNA 6330416G13 gene (6330416G13Rik)  
 RIKEN cDNA D030060M11 gene (D030060M11Rik)  
 RIKEN mammary gland RCB-0527 Jyg-MC(B) cDNA cDNA clone G930023C15 3'  
 RIKEN osteoclast-like cell cDNA clone I420003J16 3'  
 ring finger protein 36 (Rnf36)  
 serine/threonine kinase 22A (spermiogenesis associated) (Stk22a)  
 solute carrier family 10 (sodium/bile acid cotransporter family), member 3 (Slc10a3)  
 solute carrier family 12, member 4 (Slc12a4)  
 solute carrier family 7 (cationic amino acid transporter, y+ system), member 7 (Slc7a7)  
 sortilin-related VPS10 domain containing receptor 2 (Sorcs2)  
 sprouty protein with EVH-1 domain 2, related sequence (Spred2)  
 sterile alpha motif domain containing 8 (Samd8)  
 submaxillary gland androgen regulated protein 2 (Smr2)  
 thymic stromal-derived lymphopoietin, receptor (Tslpr)  
 trans-acting transcription factor 5 (Sp5)  
 transient receptor potential cation channel, subfamily V, member 3 (Trpv3)  
 transmembrane 7 superfamily member 1 (Tm7sf1)  
 tweety homolog 2 (*Drosophila*) (Ttyh2)  
 ubiquitin associated domain containing 1 (Ubadc1)  
 ubiquitin-conjugating enzyme E2E 2 (UBC4/5 homolog, yeast) (Ube2e2)  
 unc-119 homolog (*C elegans*) (Unc119)  
 WD repeat domain 23 (Wdr23)

**Table 3. Genes in Cluster 3****Gene Name**

|                                                                                                                                                        |
|--------------------------------------------------------------------------------------------------------------------------------------------------------|
| 12 days embryo spinal cord cDNA, RIKEN clone:C530011C23<br>product:hypothetical protein, full insert sequence                                          |
| 13 days embryo male testis cDNA, RIKEN clone:6030463O17 product:katanin p80<br>(WD40-containing) subunit B 1, full insert sequence                     |
| a disintegrin and metalloprotease domain 8 (Adam8)                                                                                                     |
| a disintegrin and metalloproteinase domain 9 (meltrin gamma) (Adam9)                                                                                   |
| actin related protein 2/3 complex, subunit 1B (Arpc1b)                                                                                                 |
| adducin 1 (alpha) (Add1)                                                                                                                               |
| adenylate cyclase 2 (Adcy2)                                                                                                                            |
| ADP-ribosylarginine hydrolase (Adprh)                                                                                                                  |
| ADP-ribosylation factor 2 (Arf2)                                                                                                                       |
| ADP-ribosylation factor 6 (Arf6)                                                                                                                       |
| ADP-ribosylation factor-like 2 (Arl2)                                                                                                                  |
| ADP-ribosylation factor-like 6 interacting protein 5 (Arl6ip5)                                                                                         |
| adult female placenta cDNA, RIKEN clone:1600029N02<br>product:MICROTUBULE-ASSOCIATED PROTEIN EMAP homolog [Rattus<br>norvegicus], full insert sequence |
| adult male heart cDNA, RIKEN clone:1010001P06 product:hypothetical Divalent<br>cation transporter containing protein, full insert sequence             |
| adult male testis cDNA, RIKEN clone:1700013B14 product:hypothetical protein,<br>full insert sequence                                                   |
| aldolase 1, A isoform (Aldoa)                                                                                                                          |
| anillin, actin binding protein (scraps homolog, Drosophila) (Anln)                                                                                     |
| aryl hydrocarbon receptor nuclear translocator (Arnt)                                                                                                  |
| AT rich interactive domain 5A (Mrf1 like), mRNA (cDNA clone MGC:36895<br>IMAGE:4935168)                                                                |
| ATPase, H <sup>+</sup> transporting, V1 subunit B, isoform 2 (Atp6v1b2)                                                                                |
| B7 mRNA for B lymphocyte activation antigen                                                                                                            |
| B-cell leukemia/lymphoma 10 (Bcl10)                                                                                                                    |
| Bcl2-associated athanogene 2 (Bag2)                                                                                                                    |
| biglycan (Bgn)                                                                                                                                         |
| brain glycogen phosphorylase (Pygb)                                                                                                                    |
| bridging integrator 1 (Bin1)                                                                                                                           |
| caldesmon 1 (Cald1)                                                                                                                                    |
| calpastatin (Cast)                                                                                                                                     |
| carbohydrate (chondroitin 6/keratan) sulfotransferase 4 (Chst4)                                                                                        |
| carbonic anhydrase 13 (Car13)                                                                                                                          |
| carboxypeptidase X 2 (M14 family) (Cpxm2)                                                                                                              |
| CD53 antigen (Cd53)                                                                                                                                    |
| CDC42 effector protein (Rho GTPase binding) 5 (Cdc42ep5)                                                                                               |
| CDC42 small effector 1 (Cdc42se1)                                                                                                                      |
| cDNA sequence BC025206 (BC025206)                                                                                                                      |
| cDNA sequence BC025600 (BC025600)                                                                                                                      |
| cDNA sequence BC042513 (BC042513)                                                                                                                      |
| chemokine (C-X-C motif) ligand 4 (Cxcl4)                                                                                                               |
| chloride channel calcium activated 4 (Clca4)                                                                                                           |
| COMM domain containing 10 (Commd10)                                                                                                                    |
| cyclin D1 (Cnd1)                                                                                                                                       |

---

cyclin D3 (Cnd3)

cyclin-dependent kinase 2 (Cdk2)

cytochrome b-245, alpha polypeptide (Cyba)

DNA segment, human D4S114 (D0H4S114)

DNA-damage-inducible transcript 4 (Ddit4)

DnaJ (Hsp40) homolog, subfamily A, member 4 (Dnaja4)

docking protein 1 (Dok1)

Down syndrome critical region gene 3 (Dscr3)

E2F transcription factor 1 (E2f1)

EGL nine homolog 1 (C elegans) (Egln1)

Ena-vasodilator stimulated phosphoprotein (Evl)

endothelial differentiation sphingolipid G-protein-coupled receptor 1 (Edg1)

eukaryotic translation elongation factor 1 gamma (Eef1g)

Ewing sarcoma breakpoint region 1 (Ewsr1)

expressed sequence AA407930 (AA407930)

expressed sequence AI840826 (AI840826)

fascin homolog 1, actin bundling protein (Strongylocentrotus purpuratus) (Fscn1)

fucosidase, alpha-L- 2, plasma (Fuca2)

general transcription factor IIF, polypeptide 1 (Gtf2f1)

glucose 6 phosphatase, catalytic, 3 (G6pc3)

glutathione peroxidase 7 (Gpx7)

glutathione reductase 1 (Gsr)

glycogen synthase 3, brain (Gys3)

glypican 1 (Gpc1)

growth arrest specific 6 (Gas6)

guanosine monophosphate reductase (Gmpr)

hematopoietic protein 1 (Hemp1)

hexosaminidase B (Hexb)

hippocampal amyloid precursor protein mRNA

immediate early response 5 (Ier5)

immunoglobulin superfamily containing leucine-rich repeat (Islr)

integral membrane protein 2C (Itm2c)

interferon (alpha and beta) receptor 2 (Ifnar2)

intersectin 1 (SH3 domain protein 1A) (Itsn1)

KDEL (Lys-Asp-Glu-Leu) endoplasmic reticulum protein retention receptor 3 (Kdelr3)

leprecan 1 (Lepre1)

leucine-zipper-like transcriptional regulator, 1 (Lztr1)

mannosidase 1, beta (Man1b)

mannosidase, beta A, lysosomal (Manba)

MAP kinase-interacting serine/threonine kinase 1 (Mknk1)

MAP/microtubule affinity-regulating kinase 2 (Mark2)

mb16h05r1 Soares mouse p3NMF19.5 cDNA clone IMAGE:329625 5'

me32g10r1 Soares mouse embryo NbME13.5 14.5 cDNA clone IMAGE:389250 5'

similar to gb:D10714 Mouse mRNA of NEDD-4 gene, partial sequence (MOUSE);.

megalencephalic leukoencephalopathy with subcortical cysts 1 homolog (human) (Mlc1)

membrane bound C2 domain containing protein (Mbc2)

membrane protein, palmitoylated (Mpp1)

---

---

mf78g11r1 Soares mouse embryo NbME13.5 14.5 cDNA clone IMAGE:420452  
5'.

mitogen activated protein kinase 3 (Mapk3)

mitogen-activated protein kinase 6 (Mapk6)

mKIAA0805 protein

myeloid differentiation primary response gene 88 (Myd88)

myo-inositol 1-phosphate synthase A1 (Isyna1)

myosin IC (Myo1c)

myosin X (Myo10)

neogenin (Neo1)

nuclear autoantigenic sperm protein (histone-binding) (Nasp)

nuclear distribution gene E homolog 1 (A nidulans) (Nde1)

nuclear factor of kappa light polypeptide gene enhancer in B-cells 2, p49/p100  
(Nfkb2)

nuclear transcription factor-Y alpha (Nfya)

osteoclast stimulating factor 1 (Ostf1)

outer dense fiber of sperm tails 2 (Odf2)

oxysterol binding protein-like 5 (Osbp15)

phosphoglucomutase 1 (Pgm1)

phospholipid scramblase 3, mRNA (cDNA clone MGC:28107 IMAGE:3967872)

phosphomannomutase 1 (Pmm1)

plakophilin 3 (Pkp3)

pleckstrin homology domain containing, family B (evectins) member 2, mRNA  
(cDNA clone MGC:67806 IMAGE:5344583)

PRA1 domain family 2 (Prpf2)

prion protein (Prnp)

procollagen, type IV, alpha 2 (Col4a2)

protein O-fucosyltransferase 2 (Pofut2)

protein S (alpha) (Pros1)

protein tyrosine kinase 9 (Ptk9)

protein tyrosine phosphatase, non-receptor type 1 (Ptpn1)

ras homolog gene family, member C (Rhoc)

ras homolog gene family, member G (Rhog)

regulator of G-protein signaling 19 interacting protein 1 (Rgs19ip1)

reticulocalbin 3, EF-hand calcium binding domain (Rcn3)

reticulon 4 (Rtn4), transcript variant 4

Rho GTPase activating protein 1 (Arhgap1)

RIKEN cDNA 0610009O03 gene (0610009O03Rik)

RIKEN cDNA 0610042I15 gene (0610042I15Rik)

RIKEN cDNA 1100001D10 gene, mRNA (cDNA clone IMAGE:6485405)

RIKEN cDNA 1110005F07 gene (1110005F07Rik)

RIKEN cDNA 1200015A22 gene (1200015A22Rik)

RIKEN cDNA 1700093E07 gene (1700093E07Rik)

RIKEN cDNA 2010012F05 gene (2010012F05Rik)

RIKEN cDNA 2010012F05 gene (2010012F05Rik)

RIKEN cDNA 2310079N02 gene (2310079N02Rik)

RIKEN cDNA 2700083B06 gene (2700083B06Rik)

RIKEN cDNA 2810457I06 gene (2810457I06Rik)

RIKEN cDNA 2900016D05 gene (2900016D05Rik)

RIKEN cDNA 4631426J05 gene (4631426J05Rik)

---



RIKEN cDNA 4632428N05 gene (4632428N05Rik)  
 RIKEN cDNA 4922503N01 gene (4922503N01Rik)  
 RIKEN cDNA 4930422J18 gene (4930422J18Rik)  
 RIKEN cDNA 4930506M07 gene (4930506M07Rik)  
 RIKEN cDNA 5730414C17 gene (5730414C17Rik)  
 RIKEN cDNA 6330406I15 gene (6330406I15Rik)  
 RIKEN cDNA 6530411B15 gene (6530411B15Rik)  
 RIKEN cDNA 9030611O19 gene (9030611O19Rik)  
 RIKEN cDNA B230120H23 gene (B230120H23Rik)  
 RIKEN cDNA B230317C12 gene (B230317C12Rik)  
 RNA binding motif protein 28 (Rbm28)  
 scotin gene (Scotin)  
 SEC14-like 1 (*S cerevisiae*) (Sec1411)  
 SEC5-like 1 (*S cerevisiae*) (Sec511)  
 septin 5 (Sept5)  
 septin 8 (Sept8)  
 serum response factor (Srf)  
 sestrin 2 (Sesn2)  
 sex comb on midleg homolog 1 (Scmh1)  
 sialyltransferase 5 (Siat5)  
 six transmembrane epithelial antigen of the prostate (Steap)  
 solute carrier family 15, member 4 (Slc15a4)  
 solute carrier family 35, member A4 (Slc35a4)  
 solute carrier family 37 (glycerol-3-phosphate transporter), member 2 (Slc37a2)  
 sortilin 1, mRNA (cDNA clone IMAGE:4920258)  
 spastic paraplegia 7 homolog (human) (Spg7)  
 sphingosine-1-phosphate phosphatase 1 (Sgpp1)  
 superoxide dismutase 3, extracellular (Sod3)  
 surfeit gene 5 (Surf5)  
 syntaxin 6 (Stx6)  
 testis derived transcript (Tes)  
 testis specific protein kinase 1 (Tesk1)  
 Tnf receptor-associated factor 5 (Traf5)  
 transcription factor Dp 1 (Tfdp1)  
 transcription factor E3 (Tefe3)  
 transmembrane 4 superfamily member 15 (Tm4sf15)  
 transmembrane 4 superfamily member 9 (Tm4sf9)  
 transmembrane protein 2 (Tmem2)  
 tropomyosin 3, gamma (Tpm3)  
 tubulin, alpha 1 (Tuba1)  
 tubulin, beta 5 (Tubb5)  
 ubiquitin domain containing 1 (Ubtd1)  
 UCP2 mRNA  
 UDP-glucuronate decarboxylase 1 (Uxs1)  
 UI-M-AP0-abm-b-03-0-UIs1 NIH\_BMAP\_MST cDNA clone UI-M-AP0-abm-b-03-0-UI 3'  
 UI-M-CG0p-bil-a-06-0-UIr1 NIH\_BMAP\_Ret4\_S2 cDNA clone UI-M-CG0p-bil-a-06-0-UI 5'  
 UI-M-DJ2-bwc-j-19-0-UIs1 NIH\_BMAP\_DJ2 cDNA clone UI-M-DJ2-bwc-j-19-0-UI 3'

---

vasodilator-stimulated phosphoprotein, mRNA (cDNA clone MGC:18907  
IMAGE:4240907)

vesicle-associated membrane protein, associated protein B and C (Vapb)

vinculin (Vcl)

WW domain containing transcription regulator 1 (Wwtr1)

---

**Table 4. Genes in Cluster 4**

| <b>Gene name</b>                                                                                                                                                                             |
|----------------------------------------------------------------------------------------------------------------------------------------------------------------------------------------------|
| 0 day neonate cerebellum cDNA, RIKEN clone:C230012J03 product:unknown EST, full insert sequence                                                                                              |
| 0 day neonate cerebellum cDNA, RIKEN clone:C230039M08 product:unclassifiable, full insert sequence                                                                                           |
| 10 days embryo whole body cDNA, RIKEN clone:2610510B12 product:fatty acid Coenzyme A ligase, long chain 3, full insert sequence                                                              |
| 10 days embryo whole body cDNA, RIKEN clone:2610524E12 product:unclassifiable, full insert sequence                                                                                          |
| 18 days pregnant adult female placenta and extra embryonic tissue cDNA, RIKEN clone:3830408C21 product:hypothetical protein, full insert sequence                                            |
| 2 days neonate thymus thymic cells cDNA, RIKEN clone:E430026B20 product:inferred: thyroid hormone receptor-associated protein complex component TRAP240 {Homo sapiens}, full insert sequence |
| 6072-69 Mouse E145 retina lambda ZAP II Library Mus musculus cDNA                                                                                                                            |
| 8 days embryo whole body cDNA, RIKEN clone:5730437P09 product:unknown EST, full insert sequence                                                                                              |
| adult male hippocampus cDNA, RIKEN clone:2900006B11 product:unknown EST, full insert sequence                                                                                                |
| adult male testis cDNA, RIKEN clone:1700020O03 product:unclassifiable, full insert sequence                                                                                                  |
| adult male testis cDNA, RIKEN clone:1700084F23 product:unknown EST, full insert sequence                                                                                                     |
| adult male testis cDNA, RIKEN clone:4930422N03 product:unknown EST, full insert sequence                                                                                                     |
| adult male tongue cDNA, RIKEN clone:2310039H24 product:similar to the death domain of death-associated protein kinase 1, full insert sequence                                                |
| adult male tongue cDNA, RIKEN clone:2310047G20 product:similar to RNA POLYMERASE III SUBUNIT [Homo sapiens], full insert sequence                                                            |
| aldehyde oxidase 4 (Aox4)                                                                                                                                                                    |
| aldo-keto reductase family 1, member C21 (Akr1c21)                                                                                                                                           |
| aspartoacylase (aminoacylase) 2 (Aspa)                                                                                                                                                       |
| AT rich interactive domain 3B (Bright like) (Arid3b)                                                                                                                                         |
| ATPase, H <sup>+</sup> transporting, V1 subunit B, isoform 1 (Atp6v1b1)                                                                                                                      |
| brachyury 2 (T2)                                                                                                                                                                             |
| brain protein 17 (Brp17)                                                                                                                                                                     |
| C0221D10-3 NIA Mouse 75-dpc Whole Embryo cDNA Library (Long) cDNA clone NIA:C0221D10 IMAGE:30012621 3'                                                                                       |
| C76889 Mouse 35-dpc blastocyst cDNA cDNA clone J0022D02 3'                                                                                                                                   |
| capping protein (actin filament) muscle Z-line, alpha 1 (Capza1)                                                                                                                             |
| CDC14 cell division cycle 14 homolog B ( <i>S cerevisiae</i> ) (Cdc14b)                                                                                                                      |
| cDNA sequence BC011467, mRNA (cDNA clone IMAGE:3154539)                                                                                                                                      |
| cDNA sequence BC012278 (BC012278), mRNA                                                                                                                                                      |
| cDNA sequence BC016495 (BC016495)                                                                                                                                                            |
| cDNA sequence BC021381 (BC021381)                                                                                                                                                            |
| cDNA sequence BC031353 (BC031353)                                                                                                                                                            |
| cell adhesion molecule-related/down-regulated by oncogenes (Cdon)                                                                                                                            |
| collapsin response mediator protein 1 (Crmp1)                                                                                                                                                |

copine VI (Cpne6)  
 C-type lectin-like receptor 2 (Clec2)  
 cyclic nucleotide gated channel beta 3 (Cngb3)  
 DEAH (Asp-Glu-Ala-His) box polypeptide 16 (Dhx16)  
 DNA fragmentation factor, beta subunit (Dffb)  
 EGL nine homolog 3 (C elegans) (Egln3)  
 endothelial cell growth factor 1 (platelet-derived) (Ecgf1)  
 estrogen receptor-binding fragment-associated gene 9 (Ebag9)  
 fatty acid binding protein 4, adipocyte (Fabp4)  
 F-box only protein 22 (Fbxo22)  
 forkhead protein FKHR1 (Fkhr1) mRNA  
 G protein-coupled receptor 49 (Gpr49)  
 G0/G1 switch gene 2 (G0s2)  
 gamma-glutamyltransferase-like 3 (Ggtl3)  
 genomic screened homeo box 1 (Gsh1)  
 glutamate receptor, ionotropic, AMPA3 (alpha 3) (Gria3)  
 glutamate receptor, ionotropic, kainate 5 (gamma 2) (Grik5)  
 G-protein coupled receptor 3 (Gpr3)  
 H3076E03-3 NIA Mouse 15K cDNA Clone Set cDNA clone H3076E03 3'  
 H8172H09-3 NIA Mouse Unique Gene Set Version 2 cDNA clone H8172H09 3'  
 heterogeneous nuclear ribonucleoprotein methyltransferase-like 3 (S cerevisiae) (Hrmt113)  
 histidyl-tRNA synthetase-like (Harsl)  
 hydroxyprostaglandin dehydrogenase 15 (NAD) (Hpgd)  
 inhibitor of growth family, member 1-like (Ing11)  
 inhibitor of kappaB kinase beta (Ikkkb)  
 jumonji domain containing 1B, mRNA (cDNA clone IMAGE:6406868)  
 K<sup>+</sup> voltage-gated channel, subfamily S, 1 (Kcns1)  
 KH domain containing, RNA binding, signal transduction associated 1 (Khdrbs1)  
 L0275E11-3 NIA Mouse Newborn Ovary cDNA Library cDNA clone L0275E11 3'  
 lectin, galactose binding, soluble 6 (Lgals6)  
 ma63f02r1 Soares mouse p3NMF19.5 cDNA clone IMAGE:315387 5'.  
 mac11e06x1 Soares mouse 3NbMS cDNA clone IMAGE:3999466 3'.  
 matrix extracellular phosphoglycoprotein with ASARM motif (bone) (Mepe)  
 methionine aminopeptidase-like 1 (Metap11)  
 mKIAA1935 protein  
 mm41f06x1 Stratagene mouse melanoma (#937312) cDNA clone IMAGE:524099 3'.  
 Mmusculus mRNA for G-rich box-binding protein  
 myeloblastosis oncogene-like 1 (Mybl1)  
 neuroblastoma ras oncogene (Nras)  
 NMDA receptor-regulated gene 2 (Narg2)  
 nuclear receptor subfamily 2, group E, member 3 (Nr2e3)  
 nudix (nucleoside diphosphate linked moiety X)-type motif 13 (Nudt13)  
 olfactory receptor 491 (Olfr491)  
 paired box gene 3 (Pax3)  
 polymerase (DNA directed), iota (Poli)  
 prolactin-like protein C 2 (Prllpc2)  
 protein phosphatase 1, regulatory (inhibitor) subunit 1B (Ppp1r1b)  
 protein phosphatase 1, regulatory (inhibitor) subunit 1B (Ppp1r1b)

protein phosphatase 2, regulatory subunit B (B56), alpha isoform (Ppp2r5a)  
 pseudouridine synthase 3 (Pus3)  
 putative homeodomain transcription factor 1 (Phtf1)  
 rabaptin, RAB GTPase binding effector protein 2 (Rabep2)  
 ribosomal protein S7 (Rps7)  
 RIKEN 12 days embryo spinal ganglion cDNA clone D130077F04 3'  
 RIKEN 15 days embryo head cDNA clone D930023O07 3'  
 RIKEN 9 days embryo cDNA clone D030024E12 3'  
 RIKEN activated spleen cDNA clone F830008J04 3'  
 RIKEN activated spleen cDNA clone F830019O18 3'  
 RIKEN adult female vagina cDNA clone 9930118D02 3'  
 RIKEN adult male adrenal gland cDNA clone 7330424A17 3'  
 RIKEN adult male corpus striatum cDNA clone 7630402G19 3'  
 RIKEN adult male diencephalon cDNA clone 9330154D11 3'  
 RIKEN adult male diencephalon cDNA clone 9330197K07 3' similar to AL112552  
 Botrytis cinerea strain T4 cDNA library under conditions of nitrogen deprivation  
 RIKEN adult male hypothalamus cDNA clone A230107N01 3'  
 RIKEN adult male thymus cDNA clone 5830463H17 3'  
 RIKEN cDNA 1110020A09 gene (1110020A09Rik)  
 RIKEN cDNA 1500009M05 gene (1500009M05Rik)  
 RIKEN cDNA 1700009P03 gene, mRNA (cDNA clone IMAGE:3598145)  
 RIKEN cDNA 2210408F11 gene, mRNA (cDNA clone IMAGE:5366175), with  
 apparent retained intron  
 RIKEN cDNA 2310009E07 gene (2310009E07Rik)  
 RIKEN cDNA 2610044O15 gene (2610044O15Rik)  
 RIKEN cDNA 2810422B04 gene (2810422B04Rik)  
 RIKEN cDNA 4933403M22 gene (4933403M22Rik)  
 RIKEN cDNA 4933425K02 gene (4933425K02Rik)  
 RIKEN cDNA 6330580J24 gene (6330580J24Rik)  
 RIKEN cDNA 6720407G21 gene, mRNA (cDNA clone MGC:32323  
 IMAGE:5027688)  
 RIKEN cDNA 9430015G10 gene (9430015G10Rik)  
 RIKEN cDNA 9630041N07 gene (9630041N07Rik)  
 RIKEN cDNA B230342M21 gene (B230342M21Rik)  
 RNA binding motif and ELMO domain 1 (Rbed1)  
 Sestrin 1, mRNA (cDNA clone MGC:67135 IMAGE:6414521)  
 sodium channel 21 mRNA  
 sodium channel, voltage-gated, type XI, alpha polypeptide (Scn11a)  
 solute carrier family 19 (sodium/hydrogen exchanger), member 1 (Slc19a1)  
 solute carrier family 30 (zinc transporter), member 2, mRNA (cDNA clone  
 IMAGE:4239648)  
 steroidogenic acute regulatory protein (Star)  
 surfeit gene 6 (Surf6)  
 tafazzin (Taz)  
 ubiquitin specific protease 29 (Usp29)  
 ug27c05x1 Soares\_NMPu cDNA clone IMAGE:1532840 3'.  
 UI-M-BH3-asm-e-08-0-UIs1 NIH\_BMAP\_M\_S4 cDNA clone UI-M-BH3-asm-e-  
 08-0-UI 3'.  
 UI-M-BH3-aty-a-09-0-UIs1 NIH\_BMAP\_M\_S4 cDNA clone UI-M-BH3-aty-a-09-  
 0-UI 3'.

UI-M-BH3-brr-e-07-0-UIr1 NIH\_BMAP\_M\_S4 cDNA clone UI-M-BH3-brr-e-07-0-UI 5'

UI-M-FY0-ccn-e-21-0-UIr1 NIH\_BMAP\_FY0 cDNA clone IMAGE: 6821854 5'

un02d06x1 Sugano mouse kidney mkia cDNA clone IMAGE:2372651 3'.

uo73f07x1 NCI\_CGAP\_Mam1 cDNA clone IMAGE:2648197 3'.

uv65e07x1 Soares mouse 3NbMS cDNA clone IMAGE:3412068 3'.

uv66f08x1 Soares mouse 3NbMS cDNA clone IMAGE:3412167 3'.

uw08f12y1 Soares mouse 3NbMS cDNA clone IMAGE:3416111 5'.

vl19h02x1 Stratagene mouse Tcell 937311 cDNA clone IMAGE:972723 3'.

vm76a02x1 Knowles Solter mouse blastocyst B1 cDNA clone IMAGE:1004138 3'.

vomeronasal 1 receptor, C7 (V1rc7), mRNA

vq62d06y1 Barstead mouse irradiated colon MPLRB7 cDNA clone  
IMAGE:1106891 5'.

vq64c03s1 Knowles Solter mouse 2 cell cDNA clone IMAGE:1107076 3'.

vt55b07x1 Barstead mouse irradiated colon MPLRB7 cDNA clone  
IMAGE:1166965 3'.

xeroderma pigmentosum, complementation group A (Xpa)

zinc finger protein 143 (Zfp143)

zinc finger protein 278 (Zfp278)

zinc finger protein 386 (Kruppel-like) (Zfp386)
